# Supplementary material
Source: Elsevier journal article supplement (https://www.sciencedirect.com/science/article/pii/S1885585721001596)
Supplement: mmc1 [file S1885585721001596:mmc1.pdf]

**SUPPLEMENTARY DATA**

**Table 1 of the supplementary data**

Percentage of missing values for each key variable included in the adjusted model

| Variable                                          | Percentage of missing values |
|---------------------------------------------------|------------------------------|
| Age                                               | < 0.01                       |
| Low ejection fraction at discharge                | 7.3                          |
| No coronary revascularization or thrombolysis     | 0.5                          |
| Elevated serum creatinine at admission            | 4.6                          |
| Poor quality of life (EuroQol 5 dimensions score) | 2.0                          |
| Low hemoglobin                                    | 5.3                          |
| Previous cardiac disease                          | 1.9                          |
| Previous chronic obstructive pulmonary disease    | 1.9                          |
| Elevated blood glucose at admission               | 12.0                         |
| On diuretics at discharge                         | 0.5                          |
| Male sex                                          | < 0.1                        |
| Lower educational level                           | 22.2                         |
| On aldosterone inhibitor at discharge             | 0.5                          |
| Low body mass index                               | 11.3                         |
| In-hospital cardiac complication                  | 0.8                          |
| Diagnosis of STEMI                                | < 0.1                        |
| Killip class                                      | 22.2                         |
| Region                                            | < 0.1                        |

Data are expressed as percentages.

**Table 2 of the supplementary data**

Raw data for gross national income per capita and Gini index values for each country (years 2011-2012; source: World Bank Open Data).

| Country     | Gross national income per capita (in \$)* | Gini index (in %) |
|-------------|-------------------------------------------|-------------------|
| Greece      | 24 930                                    | 34.8              |
| Netherlands | 54 480                                    | 27.8              |
| Belgium     | 46 400                                    | 28.1              |
| France      | 44 350                                    | 33.3              |
| Spain       | 30 950                                    | 35.7              |
| Italy       | 37 900                                    | 35.1              |
| Romania     | 8660                                      | 35.9              |
| UK          | 41 070                                    | 33.2              |
| Denmark     | 61 990                                    | 27.3              |
| Norway      | 90 420                                    | 25.3              |
| Luxembourg  | 76 260                                    | 32.1              |
| Finland     | 50 150                                    | 27.6              |
| Turkey      | 11 230                                    | 40.0              |
| Poland      | 12 950                                    | 33.2              |
| Germany     | 47 220                                    | 30.5              |
| Slovenia    | 24 580                                    | 24.9              |
| Mexico      | 9310                                      | 47.2              |
| Argentina   | 10 710                                    | 42.7              |
| Brazil      | 11 080                                    | 52.9              |
| Venezuela   | 11 980                                    | NA                |
| China       | 5930                                      | 42.2              |
| Hong Kong   | 36 340                                    | NA                |
| India       | 1480                                      | 37.8              |
| South Korea | 25 660                                    | 31.6              |
| Malaysia    | 10 180                                    | 43.9              |
| Singapore   | 51 740                                    | NA                |
| Vietnam     | 1540                                      | 35.6              |
| Thailand    | 5520                                      | 39.3              |

\* According to the Atlas method. NA, not available.

**Table 3 of the supplementary data**

Country wealth and wealth inequality classifications

| Country wealth distribution by terciles                                                                                                                                                        | Income distribution according to the 2011 World Bank classification                                                                                                                                              | Income inequality distribution by terciles (GINI index)                                                                                                                          |
|------------------------------------------------------------------------------------------------------------------------------------------------------------------------------------------------|------------------------------------------------------------------------------------------------------------------------------------------------------------------------------------------------------------------|----------------------------------------------------------------------------------------------------------------------------------------------------------------------------------|
| <p><i>Tercile 1</i><br/>(<math>\leq 11\,230</math> GNI per capita)</p> <p>India<br/>Vietnam<br/>Thailand<br/>China<br/>Romania<br/>Mexico<br/>Malaysia<br/>Argentina<br/>Brazil<br/>Turkey</p> | <p><i>Middle income</i><br/>(<math>&lt; 12\,475</math> GNI per capita)</p> <p>Romania<br/>Turkey<br/>Argentina<br/>Brazil<br/>Mexico<br/>Venezuela<br/>China<br/>India<br/>Malaysia<br/>Thailand<br/>Vietnam</p> | <p><i>Tercile 1</i><br/>(<math>\leq 32.1\%</math>)</p> <p>Netherlands<br/>Belgium<br/>Denmark<br/>Norway<br/>Luxembourg<br/>Finland<br/>Slovenia<br/>South Korea<br/>Germany</p> |
| <p><i>Tercile 2</i> (11 980 – 41 070 GNI per capita)</p> <p>Venezuela<br/>Poland<br/>Slovenia<br/>Greece<br/>South Korea<br/>Spain<br/>Hong Kong<br/>Italy<br/>UK</p>                          | <p><i>High income</i><br/>(<math>&gt; 12\,475</math> GNI per capita)</p> <p>Belgium<br/>Denmark<br/>Finland<br/>France<br/>Germany<br/>Greece<br/>Italy<br/>Luxembourg<br/>Netherlands</p>                       | <p><i>Tercile 2</i><br/>(33.2-35.9%)</p> <p>Greece<br/>Spain<br/>Italy<br/>Romania<br/>UK<br/>Poland<br/>France<br/>Vietnam</p>                                                  |
| <p><i>Tercile 3</i><br/>(<math>\geq 44\,350</math> GNI per capita)</p> <p>France<br/>Belgium<br/>Germany<br/>Finland<br/>Singapore<br/>Netherlands<br/>Denmark<br/>Luxembourg<br/>Norway</p>   | <p>Norway<br/>Poland<br/>Slovenia<br/>Spain<br/>United Kingdom<br/>Hong Kong<br/>South Korea<br/>Singapore</p>                                                                                                   | <p><i>Tercile 3</i><br/>(<math>\geq 37.8\%</math>)</p> <p>Argentina<br/>Malaysia<br/>Mexico<br/>Brazil<br/>Turkey<br/>China<br/>India<br/>Thailand</p>                           |

GNI, gross national income.

**Table 4 of the supplementary data**

Adjusted hazard ratios for 2-year mortality risk assessing the interaction between sex and country income level, after removing low ejection fraction, Killip class, and in-hospital cardiac complications from the original model

| Countries     | Adjusted HR<br>(95%CI) | P    | Interaction P<br>for trend |
|---------------|------------------------|------|----------------------------|
| Low-income    | 0.81 (0.69-0.95)       | .010 | .137                       |
| Middle-income | 0.63 (0.48-0.83)       | .001 |                            |
| High-income   | 0.58 (0.39-0.88)       | .009 |                            |

**Table 5 of the supplementary data**

Adjusted hazard ratios for 2-year mortality risk assessing the interaction between sex and country income level, after removing low ejection fraction, Killip class, in-hospital cardiac complications, on diuretics at discharge, and on aldosterone inhibitor at discharge from the original model

| Countries     | Adjusted HR<br>(95%CI) | P    | Interaction P<br>for trend |
|---------------|------------------------|------|----------------------------|
| Low-income    | 0.82 (0.70-0.96)       | .014 | .124                       |
| Middle-income | 0.65 (0.50-0.85)       | .002 |                            |
| High-income   | 0.58 (0.39-0.87)       | .009 |                            |

**Table 6 of the supplementary data**

Adjusted hazard ratios for 2-year mortality risk assessing the interaction between sex and country wealth inequality level, after removing low ejection fraction, Killip class, and in-hospital cardiac complications from the original model

| Countries               | Adjusted HR<br>(95%CI) | <i>P</i> | Interaction <i>P</i><br>for trend |
|-------------------------|------------------------|----------|-----------------------------------|
| Low inequality          | 0.52 (0.35-0.79)       | .002     | .035                              |
| Intermediate inequality | 0.62 (0.47-0.82)       | .001     |                                   |
| High inequality         | 0.84 (0.71-0.99)       | .036     |                                   |

**Table 7 of the supplementary data**

Adjusted hazard ratios for 2-year mortality risk assessing the interaction between sex and country wealth inequality level, after removing low ejection fraction, Killip class, in-hospital cardiac complications, on diuretics at discharge, and on aldosterone inhibitor at discharge from the original model

| Countries               | Adjusted HR<br>(95%CI) | <i>P</i> | Interaction <i>P</i><br>for trend |
|-------------------------|------------------------|----------|-----------------------------------|
| Low inequality          | 0.52 (0.35-0.79)       | .002     | .034                              |
| Intermediate inequality | 0.64 (0.48-0.85)       | .002     |                                   |
| High inequality         | 0.84 (0.71-0.99)       | .038     |                                   |

**Figure 1 of the supplementary data.** Differences in percentage of revascularization and incidence rates of all-cause mortality between men and women by levels of socioeconomic factors.

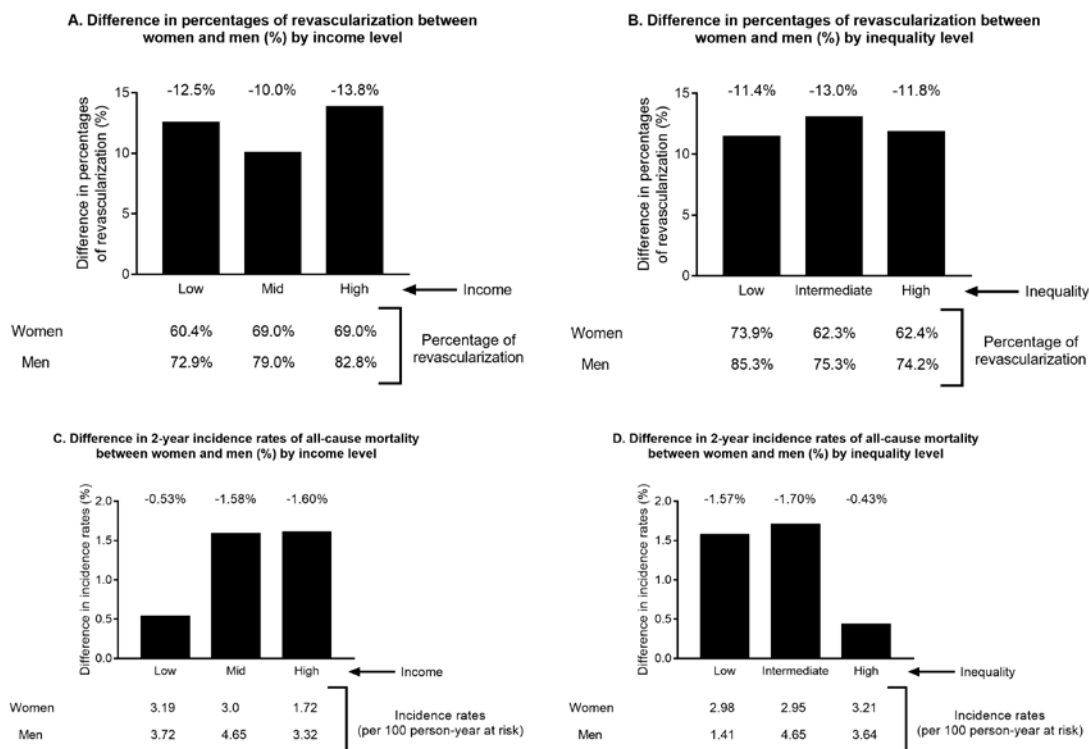

**A**, differences in percentage of revascularization by sex and levels of country wealth; **B**, differences in percentage of revascularization by sex and levels of inequality level; **C**, difference in 2-year incidence rates of all-cause mortality by sex and income categories; **D**, difference in 2-year incidence rates of all-cause mortality by sex and inequality categories.

Incidence rates for all-cause mortality were estimated using multivariate Poisson regression models including the 17 relevant predictors of death and are presented per 100 person-years at risk.
